# Supplementary material
Source: PubMed Central journal article supplement (PMC5682938)
Supplement: NIHMS902258-supplement-supplement_1.pdf [file NIHMS902258-supplement-supplement_1.pdf]

## SUPPLEMENTARY MATERIAL

### *Progression Score Model*

For clarity, vector-valued variables are in bold and matrices are capitalized. The affine transformation between the age  $t_{ij}$  of subject  $i$  at visit  $j$  and the Cog-PS  $s_{ij}$  is given by

$$s_{ij} = \alpha_i t_{ij} + \beta_i,$$

where  $\alpha_i$  and  $\beta_i$  are the subject-specific variables assumed to be independent and identically distributed across subjects with a bivariate normal distribution  $N(\mathbf{m}, V)$ .  $\alpha_i$  and  $\beta_i$  model the rate of change and baseline level of Cog-PS, respectively.

The trajectory of cognitive measure  $k$  is assumed to be a sigmoid in Cog-PS, and is given by

$$g_k(s; \boldsymbol{\omega}_k) = \frac{a_k}{1 + e^{-b_k(s-c_k)}} + d_k,$$

where  $\boldsymbol{\omega}_k = (a_k, b_k, c_k, d_k)$  are trajectory parameters to be estimated.  $d_k$  and  $a_k + d_k$  correspond to the minimum and maximum values of the sigmoid, respectively.  $c_k$  is the inflection point (the Cog-PS value at which the second derivative is zero) and  $a_k b_k / 4$  is the slope at the inflection point.

The observed cognitive measures  $y_{ijk}$  stacked into the vector  $\mathbf{y}_{ij}$  are assumed to have additive normally distributed noise, and are described by

$$\mathbf{y}_{ij} = \mathbf{g}(s; \boldsymbol{\omega}) + \boldsymbol{\epsilon}_{ij},$$

where  $\mathbf{g}$  is the vector obtained by stacking  $g_k$ , and  $\boldsymbol{\epsilon}_{ij}$  is noise, assumed to be independent and identically distributed with a multivariate normal distribution  $N(\mathbf{0}, R)$ .  $R$  is an unstructured covariance matrix that represents the variance of noise for each

cognitive measure as well as the correlations among them, and is estimated during the model fitting procedure.

Model fitting is performed using a Monte Carlo expectation-maximization (MC-EM) algorithm. The subject-specific variables and missing cognitive measures constitute the hidden variables in this framework. Model parameters include  $\omega$ ,  $\mathbf{m}$ ,  $V$ , and  $R$ . The EM approach is an iterative procedure where the most likely values of the hidden variables are computed given the data and current parameter estimates, and then the model parameters are estimated using these most likely values for the hidden variables. Since the integral in the E-step for our model does not have an analytical form, we approximate it using Monte Carlo samples.

After model fitting, we compute the cross-sectional mean and variance of the Cog-PS among cognitively normal individuals:

$$\mu = \frac{1}{|\Omega_{\text{normal}}|} \sum_{i \in \Omega_{\text{normal}}} s_{ij_0},$$

$$\sigma^2 = \frac{1}{|\Omega_{\text{normal}}|} \sum_{i \in \Omega_{\text{normal}}} (s_{ij_0} - \mu)^2$$

where  $j_0$  is the visit index at which the mean and variance are computed and  $\Omega_{\text{normal}}$  is the set of individuals who are cognitively normal at visit  $j_0$ . We selected  $j_0$  as the baseline visit in both BLSA and WRAP. We calibrate the Cog-PS scale as  $s_{ij}^* = \frac{s_{ij} - \mu}{\sigma}$ , which corresponds to the following changes in the subject-specific variables:

$$\begin{pmatrix} \alpha_i^* \\ \beta_i^* \end{pmatrix} = \frac{1}{\sigma} \begin{pmatrix} \alpha_i \\ \beta_i - \mu \end{pmatrix}.$$

This calibration is accompanied by the following standardization of the model parameters:

$$b_k^* = \sigma b_k,$$

$$c_k^* = \frac{c_k - \mu}{\sigma},$$

$$\mathbf{m}^* = \frac{1}{\sigma} \left[ \mathbf{m} - \begin{pmatrix} 0 \\ \mu \end{pmatrix} \right],$$

$$V^* = \frac{1}{\sigma^2} V.$$

Let the minimum and maximum progression scores observed in the data set after model fitting be  $s_{\min}$  and  $s_{\max}$ . We scale the trajectory of each marker so that fitted values at these values correspond across markers. Scaled values are given by

$$g_k^{(\text{scaled})}(s; \boldsymbol{\omega}_k) = \frac{g_k(s; \boldsymbol{\omega}_k) - g_k(s_{\min}; \boldsymbol{\omega}_k)}{g_k(s_{\max}; \boldsymbol{\omega}_k) - g_k(s_{\min}; \boldsymbol{\omega}_k)}.$$

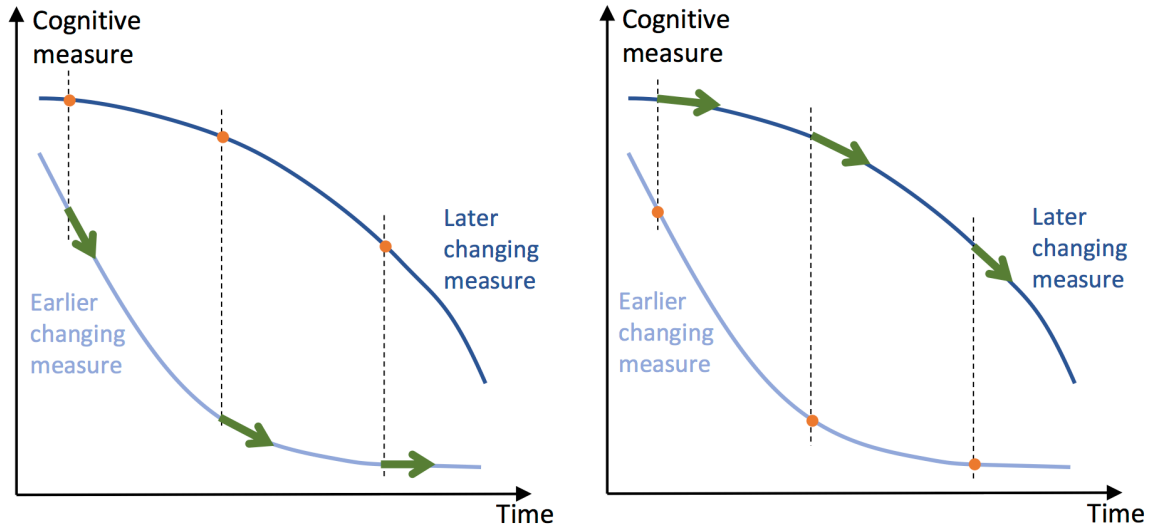

a) Expected *negative* association between **baseline values** of the **later changing measure** and the **rate of change** of the **earlier changing measure**: at higher baseline values of the later changing measure, rate of change in earlier changing measure is smaller (more negative).

b) Expected *positive* association between **baseline values** of the **earlier changing measure** and the **rate of change** of the **later changing measure**: at higher baseline values of the earlier changing measure, rate of change in later changing measure is greater (less negative).

**Figure S1.** Illustration of the expected associations between two cognitive measures given their temporal ordering.

| Predictors of CVLT imm.               | Estimate      | SE            | <i>p</i> -value |
|---------------------------------------|---------------|---------------|-----------------|
| Intercept                             | 43.0170       | 1.9700        | 0.000           |
| Education                             | 0.4289        | 0.1038        | 0.000           |
| Time                                  | -0.4359       | 0.0926        | 0.000           |
| Baseline age                          | -0.5529       | 0.0382        | 0.000           |
| Sex                                   | -7.2161       | 0.5735        | 0.000           |
| Baseline digit span forward           | 0.4209        | 0.1279        | 0.001           |
| Time × base age                       | -0.0019       | 0.0041        | 0.651           |
| Time × sex                            | -0.0022       | 0.0467        | 0.962           |
| <b>Time × base digit span forward</b> | <b>0.0268</b> | <b>0.0107</b> | <b>0.012</b>    |
| Predictors of CVLT imm.               | Estimate      | SE            | <i>p</i> -value |
| Intercept                             | 41.9780       | 1.8479        | 0.000           |
| Education                             | 0.3231        | 0.1039        | 0.002           |
| Time                                  | -0.3324       | 0.0832        | 0.000           |
| Baseline age                          | -0.5309       | 0.0377        | 0.000           |
| Sex                                   | -7.1160       | 0.5666        | 0.000           |
| Baseline digit span backward          | 0.8422        | 0.1285        | 0.000           |
| Time × base age                       | -0.0025       | 0.0041        | 0.545           |
| Time × sex                            | -0.0112       | 0.0466        | 0.810           |
| Time × base digit span backward       | 0.0156        | 0.0102        | 0.125           |
| Predictors of CVLT delayed            | Estimate      | SE            | <i>p</i> -value |
| Intercept                             | 8.5992        | 0.5894        | 0.000           |
| Education                             | 0.1183        | 0.0311        | 0.000           |
| Time                                  | -0.0951       | 0.0258        | 0.000           |
| Baseline age                          | -0.1513       | 0.0114        | 0.000           |
| Sex                                   | -1.4995       | 0.1708        | 0.000           |
| Baseline digit span forward           | 0.0897        | 0.0381        | 0.018           |
| Time × base age                       | 0.0001        | 0.0012        | 0.962           |
| Time × sex                            | -0.0170       | 0.0130        | 0.191           |
| <b>Time × base digit span forward</b> | <b>0.0066</b> | <b>0.0030</b> | <b>0.026</b>    |
| Predictors of CVLT delayed            | Estimate      | SE            | <i>p</i> -value |
| Intercept                             | 7.9821        | 0.5540        | 0.000           |
| Education                             | 0.0906        | 0.0312        | 0.004           |
| Time                                  | -0.0167       | 0.0232        | 0.470           |
| Baseline age                          | -0.1438       | 0.0112        | 0.000           |
| Sex                                   | -1.4840       | 0.1688        | 0.000           |
| Baseline digit span backward          | 0.2431        | 0.0383        | 0.000           |
| Time × base age                       | -0.0002       | 0.0011        | 0.890           |
| Time × sex                            | -0.0172       | 0.0129        | 0.185           |
| Time × base digit span backward       | -0.0030       | 0.0028        | 0.292           |

| Predictors of digit span forward  | Estimate        | SE             | <i>p</i> -value |
|-----------------------------------|-----------------|----------------|-----------------|
| Intercept                         | 5.2572          | 0.5393         | 0.000           |
| Education                         | 0.0832          | 0.0255         | 0.001           |
| Time                              | 0.0211          | 0.0355         | 0.552           |
| Baseline age                      | -0.0178         | 0.0100         | 0.074           |
| Sex                               | 0.5308          | 0.1455         | 0.000           |
| Baseline CVLT imm.                | 0.0343          | 0.0072         | 0.000           |
| Time × base age                   | 0.0001          | 0.0011         | 0.924           |
| Time × sex                        | 0.0004          | 0.0130         | 0.978           |
| Time × base CVLT imm.             | -0.0009         | 0.0007         | 0.155           |
| Predictors of digit span forward  | Estimate        | SE             | <i>p</i> -value |
| Intercept                         | 6.09630         | 0.47992        | 0.000           |
| Education                         | 0.08855         | 0.02568        | 0.001           |
| Time                              | 0.02130         | 0.02483        | 0.391           |
| Baseline age                      | -0.02578        | 0.00984        | 0.009           |
| Sex                               | 0.41390         | 0.14179        | 0.004           |
| Baseline CVLT delayed             | 0.07984         | 0.02356        | 0.001           |
| Time × base age                   | 0.00010         | 0.00109        | 0.929           |
| Time × sex                        | 0.00167         | 0.01286        | 0.897           |
| <b>Time × base CVLT delayed</b>   | <b>-0.00426</b> | <b>0.00211</b> | <b>0.043</b>    |
| Predictors of digit span backward | Estimate        | SE             | <i>p</i> -value |
| Intercept                         | 3.4228          | 0.5136         | 0.000           |
| Education                         | 0.1004          | 0.0242         | 0.000           |
| Time                              | -0.0124         | 0.0353         | 0.726           |
| Baseline age                      | -0.0136         | 0.0095         | 0.153           |
| Sex                               | 0.3193          | 0.1389         | 0.022           |
| Baseline CVLT imm.                | 0.0462          | 0.0069         | 0.000           |
| Time × base age                   | -0.0011         | 0.0011         | 0.311           |
| Time × sex                        | -0.0183         | 0.0130         | 0.160           |
| Time × base CVLT imm.             | -0.0006         | 0.0007         | 0.336           |
| Predictors of digit span backward | Estimate        | SE             | <i>p</i> -value |
| Intercept                         | 4.3338          | 0.4563         | 0.000           |
| Education                         | 0.1039          | 0.0244         | 0.000           |
| Time                              | -0.0164         | 0.0248         | 0.509           |
| Baseline age                      | -0.0197         | 0.0094         | 0.036           |
| Sex                               | 0.1959          | 0.1353         | 0.148           |
| Baseline CVLT delayed             | 0.1333          | 0.0225         | 0.000           |
| Time × base age                   | -0.0010         | 0.0011         | 0.335           |
| Time × sex                        | -0.0175         | 0.0128         | 0.173           |
| Time × base CVLT delayed          | -0.0026         | 0.0021         | 0.216           |

**Table S1.** Results of the linear mixed effects models investigating the temporal ordering of digit span and CVLT measures in the BLSA. Results described in the text are in bold. SE = Standard error, CVLT = California Verbal Learning Test, BLSA = Baltimore Longitudinal Study of Aging.
